# Supplementary material for: Identification of a novel role of ZIC3 in regulating cardiac development
Source: Oxford University Press journal article supplement (doi:10.1093/hmg/ddm106), 2007-04-27
Supplement: ddm106_Supplementary_Data.zip [file ddm106_Supplementary_Data.zip]

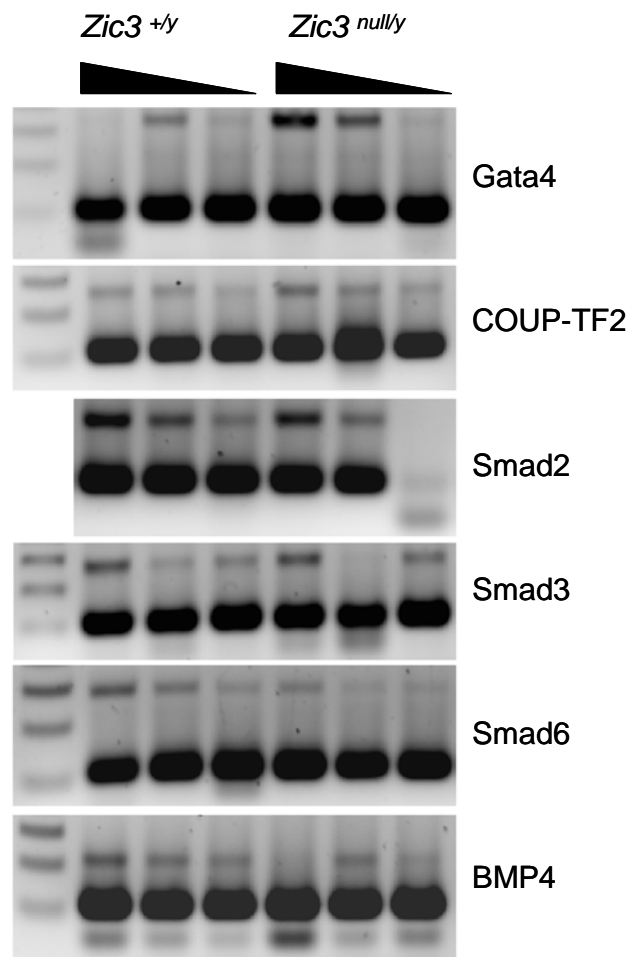

Supplemental Figure 1

Expression of candidate growth factors and transcription factors in *Zic3* null ES cells. Wildtype and *Zic3*<sup>null/y</sup> ES cell cDNA (25ng, 50ng, 75ng) was used for semi-quantitative RT-PCR using primers specific for the designated transcripts.
